# Supplementary material for: Observation of cluster spin glass behavior in thermally decomposed nanocrystalline Sn0.5Fe0.5O2−δ
Source: Royal Society of Chemistry journal article supplement (doi:10.1039/d4ma00077c), 2024-01-01
Supplement: d4ma00077c1.pdf [file d4ma00077c1.pdf]

## Supplementary Information

### **Observation of cluster spin glass behavior in thermally decomposed nanocrystalline $\text{Sn}_{0.5}\text{Fe}_{0.5}\text{O}_{2-\delta}$**

Aarti Saini,<sup>a</sup> Kisturi Dhanwant,<sup>a</sup> Mukesh Verma,<sup>b</sup> Sher Singh Meena,<sup>c</sup> Yugandhar Bitla,<sup>\*b</sup> and Ramalingam Thirumoorthi<sup>\*a</sup>

<sup>a</sup>Department of Chemistry, School of Chemical Sciences and Pharmacy, Central University of Rajasthan, NH8, Bandarsindri, Ajmer-305817, India. E-mail: [thirumoorthi@curaj.ac.in](mailto:thirumoorthi@curaj.ac.in)

<sup>b</sup>Department of Physics, School of Physical Sciences, Central University of Rajasthan, NH8, Bandarsindri, Ajmer-305817, India. E-mail: [y.bitla@curaj.ac.in](mailto:y.bitla@curaj.ac.in)

<sup>c</sup>Solid State Physics Division, Bhabha Atomic Research Centre, Mumbai 400 085, India.

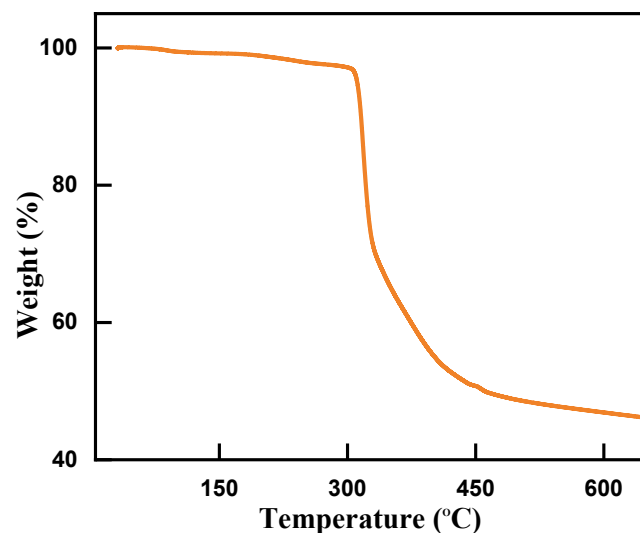

**Fig. S1** Thermogravimetric Analysis of **2**.

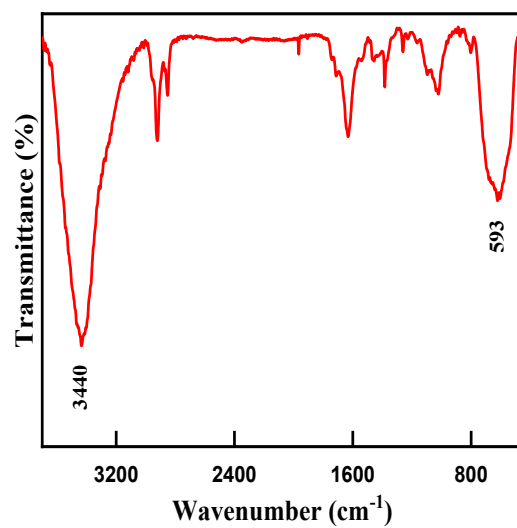

**Fig. S2** IR spectrum of **2**.

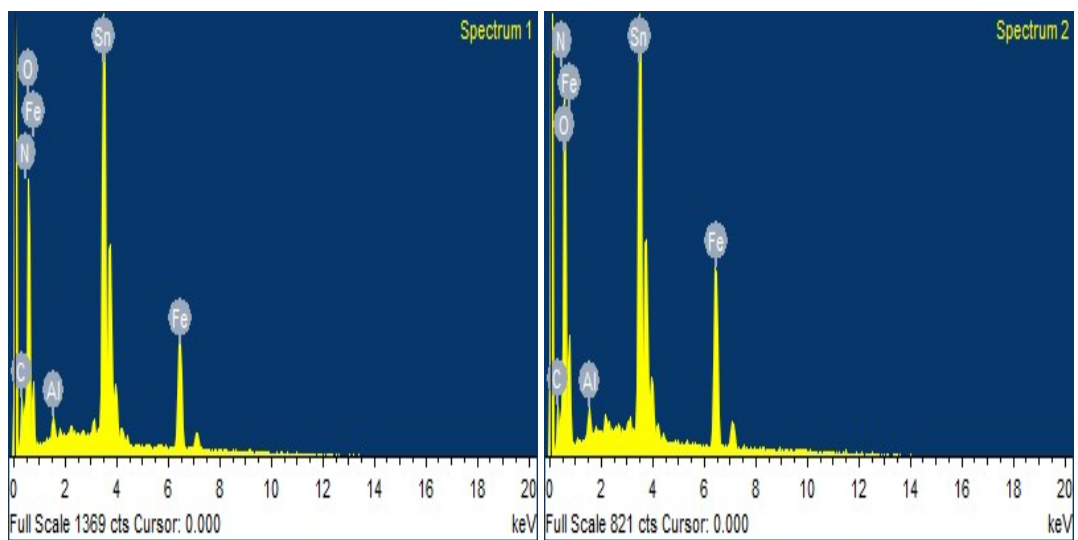

**Fig. S3** EDX spectra of 2.

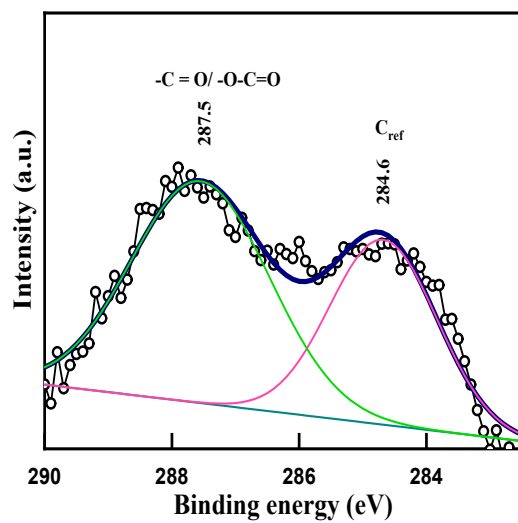

Fig. S4 C1s XPS spectrum of 2.

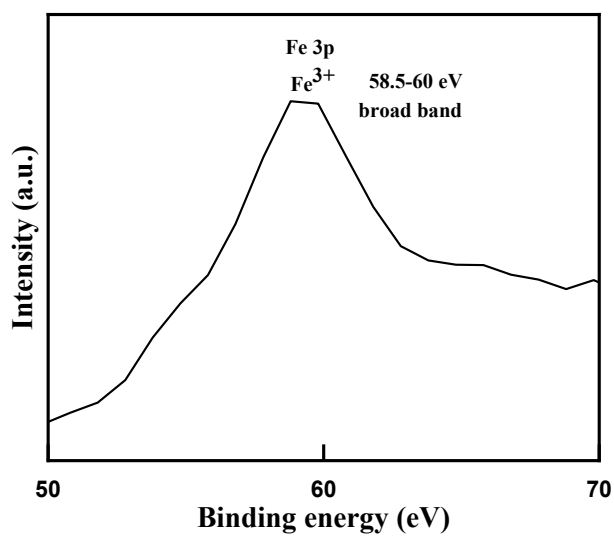

Fig. S5 Fe 3p XPS spectrum of 2.
